# Supplementary material for: The detailed distribution of T cell subpopulations in immune-stable renal allograft recipients: a single center study
Source: PubMed Central journal article supplement (PMC6369828; doi:10.7717/peerj.6417), 2019-02-08

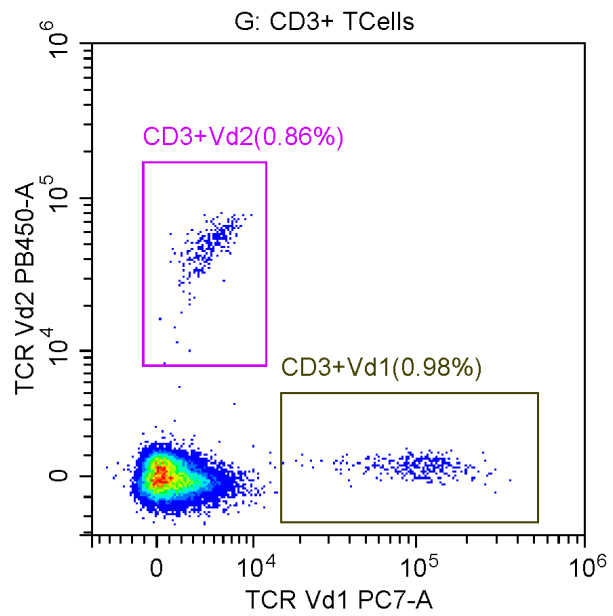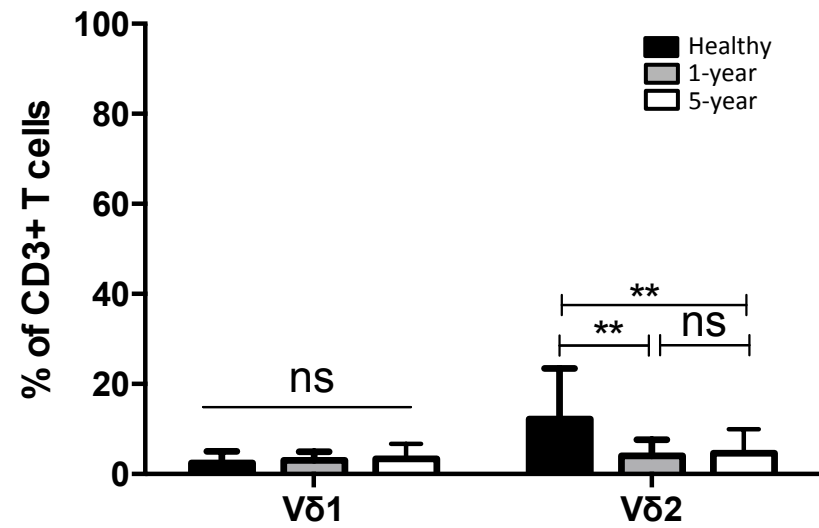

Supplement: peerj-07-6417-s001.pdf [file peerj-07-6417-s001.pdf]
